# Supplementary material
Source: Research Square preprint supplement (doi:10.21203/rs.3.rs-9764098/v1)
Supplement: Supplementary file 1 [file 2117837d4230be0f79edae56.docx]

**Table 4.** AUC of each evaluated parameter for identifying GDM.

| **Variables** | **AUC** | **Best** **threshold** | **Sensitivity** | **Specificity** | **Youden index** |
| --- | --- | --- | --- | --- | --- |
| TyHGB | 0.65 (0.65, 0.66) | 6.46 | 57.8% | 65.9% | 0.24 |
| TyG | 0.63 (0.62, 0.64) a, *** | 11.25 | 55.0% | 65.3% | 0.20 |
| TG/HDL-C | 0.58 (0.57, 0.59) b, *** | 1.21 | 50.5% | 61.5% | 0.12 |

a AUC of TyHGB was used as the reference to compare with AUC of TyG;

b AUC of TyHGB was used as the reference to compare with AUC of TG/HDL-C.

AUC, area under the curve; GDM, gestational diabetes mellitus; TyHGB, triglyceride high-density cholesterol-glucose body index; TyG, triglyceride glucose index; TG, triglyceride; HDL-C, high-density lipoprotein cholesterol. *** *P* < 0.001
