# Supplementary material
Source: Research Square preprint supplement (doi:10.21203/rs.3.rs-9764098/v1)
Supplement: Supplementary file 2 [file 4e083a2f5d16aff1d265f0cb.docx]

**Table 1** Baseline characteristics between participants with and without GDM

| **Characteristics** | **GDM**  **(n=5,823, 20.1%)** | **Non-GDM**  **(n=23,219, 79.9%)** | ***P*-value** |
| --- | --- | --- | --- |
| Maternal age (years) | 32.6±4.5 | 30.8±4.1 | < 0.001 |
| < 30 | 1,593 (27.3) | 9,864 (42.5) |  |
| 30-34 | 2,322 (39.9) | 8,883 (38.3) |  |
| ≥ 35 | 1,908 (32.8) | 4,472 (19.2) |  |
| Pre-pregnancy BMI (kg/m2) | 21.6±3.0 | 20.6±2.6 | < 0.001 |
| Underweight | 804 (13.8) | 4,667 (20.1) |  |
| Normal weight | 3,931 (67.5) | 16,226 (69.9) |  |
| Overweight and obese | 1,088 (18.7) | 2,326 (10.0) |  |
| Gestational weight gain (kg) | 12.4±4.4 | 14.3±4.3 | < 0.001 |
| Adequate | 2,400 (41.2) | 10,630 (45.8) |  |
| Inadequate | 2,246 (38.6) | 5,571 (24.0) |  |
| Excess | 1,177 (20.2) | 7,018 (30.2) |  |
| Smoking history (n, %) |  |  | 0.992 |
| Yes | 1 (0.06) | 13 (0.06) |  |
| No | 1,667 (99.94) | 21,895 (99.94) |  |
| Drinking history (n, %) |  |  | 0.260 |
| Yes | 1 (0.06) | 4 (0.02) |  |
| No | 1,667 (99.94) | 21,904 (99.98) |  |
| Han ethnic group (n, %) | 5,800 (99.6) | 23,124 (99.6) | 0.879 |
| Education (n, %) |  |  | 0.043 |
| Primary or below | 27 (0.5) | 75 (0.3) |  |
| Middle school | 810 (13.9) | 3,014 (13.0) |  |
| College or above | 4,986 (85.6) | 20,130 (86.7) |  |
| Gestational age at delivery (weeks) | 38.8±1.5 | 39.2±1.4 | < 0.001 |
| Gravidity (n, %) |  |  | < 0.001 |
| 0 | 1,994 (34.2) | 9,696 (41.8) |  |
| 1 | 1,818 (31.2) | 7,074 (30.5) |  |
| ≥ 2 | 2,011 (34.6) | 6,449 (27.7) |  |
| Parity (n, %) |  |  | < 0.001 |
| 0 | 3,156 (54.2) | 14,398 (62.0) |  |
| 1 | 2,526 (43.4) | 8,444 (36.4) |  |
| ≥ 2 | 141 (2.4) | 377 (1.6) |  |
| IVF (n, %) | 319 (5.5) | 967 (4.2) | < 0.001 |
| FPG (mmol/L) | 4.65±0.50 | 4.35±0.30 | < 0.001 |
| 1h-PG (mmol/L) | 10.08±1.43 | 7.52±1.32 | < 0.001 |
| 2h-PG (mmol/L) | 8.87±1.38 | 6.53±1.00 | < 0.001 |
| TG (mmol/L) | 2.42±0.95 | 2.18±0.85 | < 0.001 |
| TC (mmol/L) | 5.93±1.09 | 5.96±1.03 | 0.122 |
| HDL-C (mmol/L) | 1.91±0.44 | 1.95±0.41 | < 0.001 |
| LDL-C (mmol/L) | 2.89±0.88 | 2.93±0.84 | 0.001 |
| TG/HDL-c | 1.38±0.76 | 1.20±0.62 | < 0.001 |
| TyG | 11.34±0.37 | 11.17±0.35 | < 0.001 |
| TyHGB | 6.79±1.05 | 6.31±0.78 | < 0.001 |

Continuous variables were presented as means ± standard deviation. Categorical data were presented as frequencies (percentages).

GDM, gestational diabetes mellitus; BMI, body mass index; IVF, in vitro fertilization; FPG, fasting plasma glucose; 1h-PG, 1-hour plasma glucose; 2h-PG, 2-hour plasma glucose; TG, triglyceride; TC, total cholesterol; HDL-C, high-density lipoprotein cholesterol; LDL-C, low-density lipid cholesterol; TyG, triglyceride glucose index; TyHGB, triglyceride high-density cholesterol-glucose body index.
