# Supplementary material
Source: Research Square preprint supplement (doi:10.21203/rs.3.rs-9764098/v1)
Supplement: Supplementary file 3 [file 64688bb0f5dc0832e8ab9fd2.docx]

**Table 2.** Association between TyHGB and GDM in logistic regression analysis

|  | **Relative risks (95% CI)** | | | | | |
| --- | --- | --- | --- | --- | --- | --- |
| Exposure | Model 1 | *P*-value | Model 2 | *P*-value | Model 3 | *P*-value |
| Continuous |  |  |  |  |  |  |
| TyHGB | 1.83 (1.77-1.89) | < 0.001 | 1.69 (1.62-1.76) | < 0.001 | 1.71 (1.64-1.79) | < 0.001 |
| Categorical |  |  |  |  |  |  |
| Q1 | Ref |  | Ref |  | Ref |  |
| Q2 | 1.27 (1.15-1.40) | < 0.001 | 1.16 (1.05-1.28) | 0.003 | 1.23 (1.12-1.36) | < 0.001 |
| Q3 | 1.86 (1.69-2.03) | < 0.001 | 1.57 (1.42-1.73) | < 0.001 | 1.69 (1.53-1.87) | < 0.001 |
| Q4 | 3.89 (3.56-4.24) | < 0.001 | 3.07 (2.76-3.40) | < 0.001 | 3.32 (2.98-3.69) | < 0.001 |
| *P* for trend |  | < 0.001 |  | < 0.001 |  | < 0.001 |

Model 1: unadjusted;

Model 2: adjusted for maternal age, pre-pregnancy body mass index;

Model 3: adjusted for maternal age, pre-pregnancy body mass index, smoking history, drinking history, ethnicity, education level, parity, gravidity, in vitro fertilization status, and gestational weight gain.

TyHGB, triglyceride high-density cholesterol-glucose body index; GDM, gestational diabetes mellitus; CI, confidence interval; Q, quartile.
