# Supplementary material
Source: Research Square preprint supplement (doi:10.21203/rs.3.rs-9764098/v1)
Supplement: Supplementary file 4 [file fc297a1e1bb07cafbe63f899.docx]

**Table 3.** Subgroup analysis of the association between the TyHGB and GDM risk

| **Subgroup** | **RR (95% CI)** | ***P*-value** | **Adjusted RR (95% CI)** | ***P*-value** |
| --- | --- | --- | --- | --- |
| Age (years) |  |  |  |  |
| < 30 |  |  |  |  |
| TyHGB Q1 | Ref |  | Ref |  |
| TyHGB Q2 | 1.20 (1.02, 1.40) | 0.030 | 1.20 (1.02, 1.42) | 0.029 |
| TyHGB Q3 | 1.77 (1.51, 2.08) | < 0.001 | 1.78 (1.51, 2.11) | < 0.001 |
| TyHGB Q4 | 3.61 (3.11, 4.19) | < 0.001 | 3.54 (2.95, 4.25) | < 0.001 |
| 30-35 |  |  |  |  |
| TyHGB Q1 | Ref |  | Ref |  |
| TyHGB Q2 | 1.25 (1.07, 1.46) | 0.004 | 1.31 (1.12, 1.54) | 0.001 |
| TyHGB Q3 | 1.73 (1.49, 2.00) | < 0.001 | 1.79 (1.53, 2.09) | < 0.001 |
| TyHGB Q4 | 3.53 (3.08, 4.06) | < 0.001 | 3.59 (3.03, 4.24) | < 0.001 |
| ≥ 35 |  |  |  |  |
| TyHGB Q1 | Ref |  | Ref |  |
| TyHGB Q2 | 0.87 (1.07, 1.32) | 0.518 | 1.08 (0.87, 1.34) | 0.489 |
| TyHGB Q3 | 1.39 (1.15, 1.69) | 0.001 | 1.37 (1.11, 1.68) | 0.003 |
| TyHGB Q4 | 2.79 (2.32, 3.35) | < 0.001 | 2.61 (2.11, 3.24) | < 0.001 |
| BMI |  |  |  |  |
| Underweight |  |  |  |  |
| TyHGB Q1 | Ref |  | Ref |  |
| TyHGB Q2 | 1.37 (1.15, 1.64) | < 0.001 | 1.40 (1.16, 1.68) | < 0.001 |
| TyHGB Q3 | 1.83 (1.46, 2.29) | < 0.001 | 1.95 (1.54, 2.46) | < 0.001 |
| TyHGB Q4 | 2.43 (1.79, 3.29) | < 0.001 | 2.43 (1.76, 3.34) | < 0.001 |
| Normal weight |  |  |  |  |
| TyHGB Q1 | Ref |  | Ref |  |
| TyHGB Q2 | 1.28 (1.13, 1.45) | < 0.001 | 1.24 (1.10, 1.41) | 0.001 |
| TyHGB Q3 | 1.91 (1.70, 2.15) | < 0.001 | 1.75 (1.55, 1.99) | < 0.001 |
| TyHGB Q4 | 3.79 (3.38, 4.26) | < 0.001 | 3.36 (2.95, 3.82) | < 0.001 |
| Overweight and obese |  |  |  |  |
| TyHGB Q1& Q2 a | Ref |  | Ref |  |
| TyHGB Q3 | 2.15 (1.24, 3.71) | 0.006 | 1.95 (1.12, 3.39) | 0.018 |
| TyHGB Q4 | 5.29 (3.14, 8.93) | < 0.001 | 4.41 (2.59, 7.51) | < 0.001 |
| Gestational weight gain |  |  |  |  |
| Inadequate |  |  |  |  |
| TyHGB Q1 | Ref |  | Ref |  |
| TyHGB Q2 | 1.28 (1.09, 1.49) | 0.002 | 1.20 (1.02, 1.42) | 0.025 |
| TyHGB Q3 | 1.88 (1.62, 2.18) | < 0.001 | 1.68 (1.42, 1.98) | < 0.001 |
| TyHGB Q4 | 3.64 (3.16, 4.20) | < 0.001 | 3.10 (2.59, 3.70) | < 0.001 |
| Adequate |  |  |  |  |
| TyHGB Q1 | Ref |  | Ref |  |
| TyHGB Q2 | 1.33 (1.15, 1.54) | < 0.001 | 1.23 (1.06, 1.43) | 0.007 |
| TyHGB Q3 | 1.95 (1.69, 2.24) | < 0.001 | 1.69 (1.45, 1.97) | < 0.001 |
| TyHGB Q4 | 4.22 (3.69, 4.82) | < 0.001 | 3.21 (2.73, 3.77) | < 0.001 |
| Excess |  |  |  |  |
| TyHGB Q1 | Ref |  | Ref |  |
| TyHGB Q2 | 1.55 (1.20, 2.01) | 0.001 | 1.44 (1.11, 1.86) | 0.007 |
| TyHGB Q3 | 2.33 (1.83, 2.98) | < 0.001 | 1.97 (1.54, 2.54) | < 0.001 |
| TyHGB Q4 | 5.74 (4.58, 7.20) | < 0.001 | 4.38 (3.40, 5.64) | < 0.001 |

TyHGB, triglyceride high-density cholesterol-glucose body index; GDM, gestational diabetes mellitus; RR, relative risk; CI, confidence interval; Q, quartile; BMI, body mass index.

a Since no cases of GDM were observed in the TyHGB Q1 group among overweight and obese individuals, the TyHGB Q1 and Q2 groups were merged to serve as the reference group.
